1 **FRONT MATTER**

2

3 **Title:**

4 Full title: [max 100 characters : now 102 without spaces]

5 Easy MPE: Extraction of quality microplot images for UAV-based high-throughput  
6 field phenotyping

7

8 Short title: [max 40 characters : now 38 without spaces]

9 Easy Microplot Extraction

10

11 **Authors**

12 Léa Tresch<sup>1,2</sup>, Yue Mu<sup>4</sup>, Atsushi Itoh<sup>3</sup>, Akito Kaga<sup>5</sup>, Kazunori Taguchi<sup>3</sup>, Masayuki Hirafuji<sup>1</sup>,  
13 Seishi Ninomiya<sup>1,4</sup>, Wei Guo<sup>1</sup>

14

15 **Affiliations**

- 16 1. International Field Phenomics Research Laboratory, Institute for Sustainable Agro-  
17 ecosystem Services, Graduate School of Agricultural and Life Sciences, The University of  
18 Tokyo, Tokyo, Japan
- 19 2. Montpellier SupAgro, Montpellier, France
- 20 3. Memuro Upland Farming Research Station, Hokkaido Agricultural Research Center,  
21 National Agriculture and Food Research Organization, Hokkaido, Japan
- 22 4. Plant Phenomics Research Center, Nanjing Agricultural University, Nanjing, China
- 23 5. Institute of Crop Science, National Agriculture and Food Research Organization, Tsukuba  
24 City, Ibaraki, Japan

25

26 **Abstract**

27 Microplot extraction (MPE) is a necessary image-processing step in unmanned aerial vehicle  
28 (UAV)-based research on breeding fields. At present, it is manually using ArcGIS, QGIS or  
29 other GIS-based software, but achieving the desired accuracy is time-consuming. We therefore  
30 developed an intuitive, easy-to-use semi-automatic program for MPE called Easy MPE to  
31 enable researchers and others to access reliable plot data UAV images of whole fields under  
32 variable field conditions. The program uses four major steps: (1). Binary segmentation, (2).  
33 Microplot extraction, (3). Production of \*.shp files to enable further file manipulation, and (4).  
34 Projection of individual microplots generated from the orthomosaic back onto the raw aerial

35 UAV images to preserve the image quality. Crop rows were successfully identified in all trial  
36 fields. The performance of proposed method was evaluated by calculating the intersection-over-  
37 union (IOU) ratio between microplots determined manually and by Easy MPE: The average  
38 IOU ( $\pm$ SD) of all trials was 91% ( $\pm$ 3).

39

40

## 41 **1. Introduction**

42 One of the major aims of investigations to improve agricultural machinery has been to  
43 reduce yield gaps [1]. The way we understand fields has been revolutionized by advances in  
44 yield monitoring technology, which have allowed field data to be measured with more and  
45 more precision. As a result, crop yield can now be measured at the microplot scale, and the  
46 same level of accuracy has been achieved by seeders and other kinds of agricultural  
47 machinery.

48 In recent years, great advances in sensors, aeronautics, and high-performance computing,  
49 in particular, have made high-throughput phenotyping more effective and accessible [2]. The  
50 characterization of quantitative traits such as yield and stress tolerance at fine-scale allows  
51 even complex phenotypes to be identified [3]. Eventually, specific varieties derived from a  
52 large number of different lines can be selected to reduce yield variation (e.g., [4–7]).  
53 Breeding efficiency now depends on scaling up the phenotype identification step, that is, on  
54 high-throughput phenotyping, as high-throughput genotyping is already providing genomic  
55 information quickly and cheaply [2].

56 Unmanned aerial vehicles (UAVs) have become one of the most popular information  
57 retrieval tools for high-throughput phenotyping, owing to the reduced costs of purchasing and  
58 deploying them, their easier control and operation, and their higher sensor compatibility.  
59 Proposed image analysis pipelines for extracting useful phenotypic information normally  
60 include several steps: 3D mapping by structure-from-motion (SfM) and multi-view stereo  
61 (MVS) techniques, generation of orthomosaic images (an image composed of several  
62 orthorectified aerial images stitched together) and digital surface models, extraction of  
63 microplots, and extraction of phenotypic traits. Among these steps, microplot extraction  
64 (MPE; i.e., cropping images to the size of individual subplots) is essential because it allows  
65 fields (or plots; that is to say cultured areas made of several microplots) to be examined at a  
66 level of detail corresponding to the level of accuracy of technologies such as the yield  
67 monitoring and seeder technologies mentioned above, ultimately providing better results [4,  
68 8].

69 There are three main ways to perform MPE:

- 70 - Manually, usually by using geographic information system (GIS) software,
- 71 - Semi-automatically, which still requires some manual input,
- 72 - Automatically, which requires no manual input.

73 To the best of our knowledge, no fully automatic microplot extraction method has been  
74 published so far.

75 Several semi-automatic techniques have been developed to extract microplots from UAV  
76 images. A method proposed by Hearst [9] takes advantage of device interconnectivity by  
77 using the information on the geo-localization of crop rows from the seeder. The resulting  
78 orthomosaic thus contains spatial landmarks that allow it to be divided into microplots.  
79 However, this approach requires access to sophisticated technology and a high skill level.  
80 Most methods use image analysis tools, and they all require the user to define the maximum  
81 borders of one subplot. The whole field is then divided into equal-sized replicate subplots  
82 [10]. These methods require the plot to be very regular and consistently organized, which may  
83 not be the case, especially for breeding fields not planted by machine. More recently, Khan  
84 and Miklavcic [11] proposed a grid-based extraction method in which the plot grid is adapted  
85 to match the actual positions of plots. This technique allows for more field heterogeneity but  
86 it still requires the width/height, horizontal/vertical spacing, and orientation of a 2D vector  
87 grid cell to be specified interactively.

88 All of these techniques generally start with an orthomosaic image of the field rather than  
89 with raw images (i.e., unprocessed aerial images taken by the UAV, which are used to  
90 produce the orthomosaic). The consequent loss of image quality is an important consideration  
91 for high-throughput phenotyping.

92 Most MPE is still done manually, such as using shapefiles [12], the ArcGIS editor [13],  
93 the Fishnet function of Arcpy in ArcGIS [14], or the QGIS tool for plot extraction [15].  
94 Manual extraction is not only time-consuming, depending on the size of the whole field, but  
95 also potentially less accurate because it is prone to human bias.

96 In this paper, we propose a semi-automated MPE solution based on image analysis. We  
97 tested two kinds of crops on the proposed method on six different field datasets. We chose  
98 sugar beet and soybean because of the importance of both crops are expected their unique  
99 growth patterns in each [22,23]. The growth pattern of the young plants fulfills the program  
100 requirements perfectly because they are generally planted in dense rows. Our ultimate goal  
101 was to elucidate the small differences in sugar beet and soybean growth in relation to  
102 microclimatic conditions in each field [24, 25]. Therefore, the accurate identification of micro

103 plots allows the phenotypic traits of the crop in different locations of a field to be assessed,  
104 which could validate whether it was the correct program for high-throughput phenotyping of  
105 growth patterns or sizes correctly. First, as a pre-processing step, a binary segmented image is  
106 produced by one of two image segmentation methods: application of the Excess Green (ExG)  
107 vegetation index [16] followed by the Otsu threshold [17], or the EasyPCC program [18, 41].  
108 The ExG index and the Otsu threshold have been shown to perform well at differentiating  
109 vegetation from non-plant elements (mostly bare soil) [19 – 21]. The EasyPCC program uses  
110 machine learning to associate pixels with either vegetation or background areas, based on the  
111 manual selection of example plants in the selected images; this program can produce a  
112 segmented image of a field when the ExG index and Otsu threshold method may not work,  
113 for example, because of light and color variation or other outdoor environmental variations on  
114 the image [19 – 21].

115 The pre-processing step is followed by MPE. To extract microplots, planted areas of the  
116 field are identified by summing the pixels classified as vegetation and then calculating the  
117 average. Microplot columns (90-degree rotation from crop rows) are identified by comparing  
118 vegetation pixel values with the average and erasing those below a threshold value. The same  
119 procedure is then applied to the column images to identify crop rows within each microplot  
120 column. The initial orthomosaic is then cropped to the borders identified by the program and a  
121 shapefile is generated for each microplot to facilitate further image manipulation in GIS  
122 software or custom programs. Microplot intersection points are also saved in an Excel  
123 spreadsheet file.

124 Finally, if raw unprocessed aerial images and SfM files (containing information on  
125 internal and external camera parameters) are available, the program can directly extract the  
126 identified microplots from the raw images so that the microplots will contain the maximum  
127 level of detail.

128

## 129 **2. Materials and Methods**

130

### 131 *2.1. Experimental Fields and Image Acquisition.*

132 Six field datasets were used as experimental units (Table 1, Table S1). The plants were sown  
133 in precise plot configurations, and all trial fields were managed according to the ordinary local  
134 management practices.

135

136  
137  
138  
139

**Table 1: Trial field and image acquisition information**

| Dataset | Crop      | Field location      | Sowing date<br>(dd/mm/yyyy) | UAV flight<br>date<br>(dd/mm/yyyy) | UAV flight<br>height (m) | No. of<br>columns | No. of<br>crop<br>rows |
|---------|-----------|---------------------|-----------------------------|------------------------------------|--------------------------|-------------------|------------------------|
| 1       | Sugarbeet | Kasaigun Memurocho, | 25/04/2017                  | 31/05/2017                         | 30                       | 4                 | 34                     |
| 2       | Sugarbeet | Hokkaido, Japan     | 27/04/2017                  | 16/06/2017                         | 30                       | 7                 | 48                     |
| 3       | Soybean   | Nishi-Tokyo, Tokyo, | 08/06/2017                  | 10/07/2017                         | 15                       | 9                 | 39                     |
| 4       | Soybean   | Japan               | 15/06/2017                  | 10/07/2017                         | 10                       | 12                | 32                     |
| 5       | Sugarbeet | Kasaigun Memurocho  | 26/04/2018                  | 08/06/2018                         | 30                       | 8                 | 48                     |
| 6       | Sugarbeet | Hokkaido, Japan     | 23/04/2018                  | 05/06/2018                         | 30                       | 4                 | 54                     |

140  
141  
142  
143  
144  
145  
146  
147  
148  
149  
150  
151

Before image acquisition, the waypoint routing of the UAV was specified by using a self-developed software tool that automatically creates data formatted for import into Litchi for DJI drones (VC Technology, UK). This readable waypoint routing data allowed highly accurate repetition of flight missions so that all images had the same spatial resolution. Orthomosaics of the georeferenced raw images were then produced in Pix4Dmapper Pro software (Pix4D, Lausanne, Switzerland; Table S1).

UAVs overflew each field several times during the growing period of each crop. The flight dates in Table 1 are dates on which images that suited the program requirements were obtained (i.e., with uniform crop rows that did not touch each other and low content of weeds).

152

## 2.2. Easy Microplot Extraction.

The Easy MPE code is written in the Python language (Python Software Foundation, Python Language Reference, v. 3.6.8 [26]) with the use of the following additional software packages: OpenCV v. 3.4.3 [27]; PyQt5 v. 5.9.2 [28]; NumPy v. 2.6.8 [29], Scikit-Image v. 0.14.1 [30]; Scikit-Learn v. 0.20.1 [31]; pyshp package v. 2.0.1 [32]; rasterio v. 1.0.13 [33], rasterstats v. 0.13.0 [34]; and Fiona v. 1.8.4 [35].

The main aim of the program is to identify columns, and crop rows within each column, on an orthomosaic image of a field so that microplot areas can be extracted. Additional outputs that the user may need for further analysis of the data are also provided. The program comprises four processing steps: binary segmentation (pre-processing); microplot identification and

162 extraction; production of shapefile and additionally production of microplots extracted from  
 163 raw individual images by reverse calculation.

164 The code was run on a laptop computer (Intel Core i7-8550U CPU @ 1.80 GHz, 16 GB  
 165 RAM, Windows 10 Home 64-bit operating system) connected to an external graphics  
 166 processing unit (NVIDIA, GeForce GTX 1080Ti).

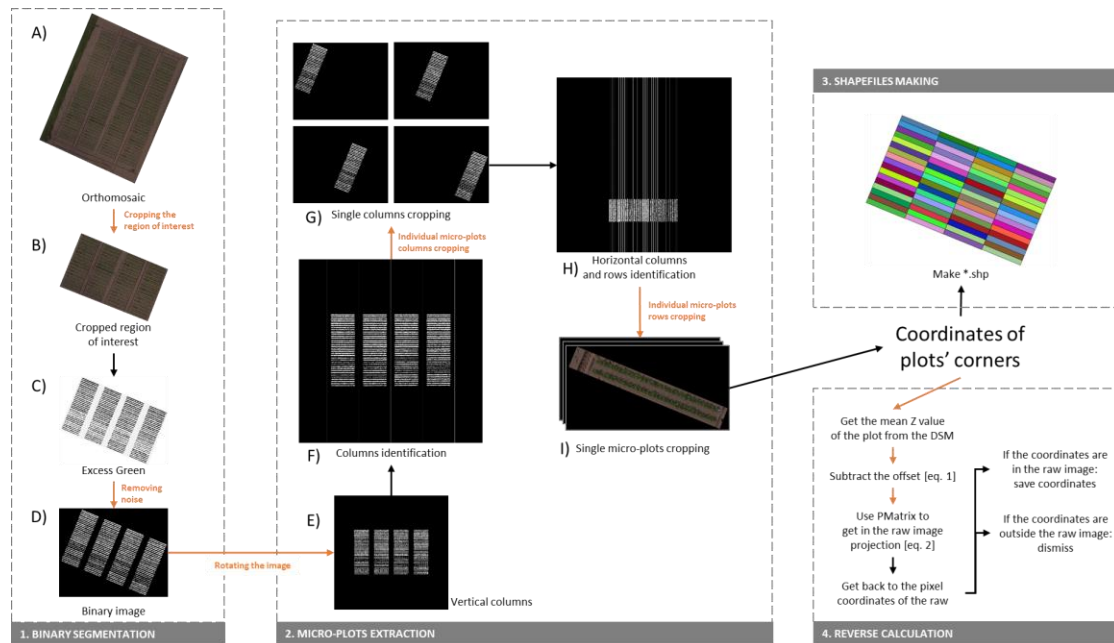

167

168 **Figure 1: Global pipeline of the Easy MPE program, demonstrated using dataset 3**

169 Figure 1 shows the four major steps of the Easy MPE program, and the binary  
 170 segmentation and microplot extraction details are described in smaller steps A–I. Orange arrows  
 171 indicate automated steps. In step A to B, however, the region of interest in the orthomosaic  
 172 must be manually selected. Note that for simplicity and clarity, some steps have been omitted.

### 173 1. Binary segmentation

174 The ExG vegetation index (step C) and the Otsu threshold (step D) are applied to each pixel  
 175 of an orthomosaic image to produce a segmented binary image (Figure 1). Excess Green is  
 176 calculated as:

$$177 \quad ExG = 2 \times G - R - B \quad (1)$$

178 where  $R$ ,  $G$ , and  $B$  are the normalized red, green, and blue channel values of a pixel.

179 In the case of a very bright or very dark environment, where the Otsu threshold does not  
 180 perform well [19] [20] [21], EasyPCC is used [18].

### 181 2. Microplot extraction

182 MPE is the core step of the program. In this step, binary images of diverse field layouts are  
 183 segmented (partitioned) into columns and crop rows.

184 First, the image is rotated (step E) using the coordinates of the bounding box drawn around  
185 the binary image. In step A, it is important to draw the boundaries of the region of interest so  
186 that no object that might be segmented lies between the boundaries and the crop; otherwise, the  
187 image will not be correctly rotated.

188 Second, columns are extracted by identifying local maxima along the  $x$ -axis of the image,  
189 based on the sum of the white pixels distributed in the columns. To make the columns even, the  
190 binary image is slightly manipulated with an erosion followed by a horizontal dilatation. White  
191 pixels along the  $x$ -axis are first summed and their average is calculated. Then all values that are  
192 less than  $\frac{1}{3}$  of the average are erased. The erased pixels represent “transition parts” at either  
193 end of the crop rows as well as small intercolumn weeds. Columns are then identified (step F)  
194 by scanning along the  $x$ -axis: a transition from black to white pixels marks the left edge of a  
195 column, and the subsequent transition from white to black pixels marks its right edge.

196 Third, on the orthomosaic binary image, crop rows are identified within each column (step  
197 H). Because crop rows are more homogeneous along the  $x$ -axis than the columns identified in  
198 step F, the intra-row variation in the sum of the white pixels is expected to be small; moreover,  
199 inter-row weeds are expected to be frequent. Thus, values of less than  $\frac{1}{2}$  of the average sum are  
200 erased in step H. Then crop rows are identified by scanning along the  $y$ -axis and identifying  
201 transitions in the segmented image from black to white or from white to black pixels.

202 According to the number of crop rows and the number of columns in each field input  
203 into the program, microplots are cropped and saved (step G). Their coordinates are calculated  
204 in the orthomosaic coordinate system, or if the orthomosaic does not include coordinates, from  
205 the positions of the pixels on the image.

### 206 **3. Shapefile production and Reverse calculation**

207 The program can output shapefiles of the microplots.

208 Shapefiles are produced by using the coordinates calculated during the MPE step, with the  
209 same characteristics as the orthomosaic image.

210 Reverse calculation is the process of projecting individual microplots determined from the  
211 orthomosaic image back onto the corresponding area of the raw images. It aims to preserve the  
212 raw image resolution, instead of the lower quality of the orthomosaic image (Figure 2), for  
213 estimation of phenotypic traits such as ground coverage [8].

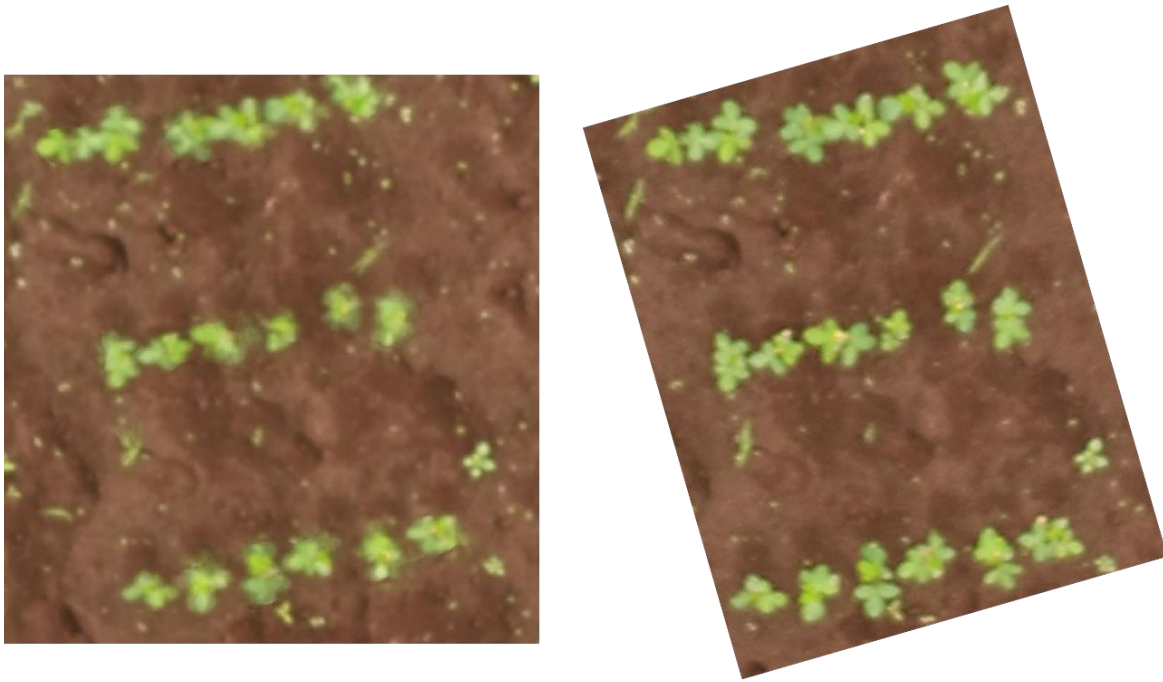

214

215

216

**Figure 2: Quality diminution in an orthomosaic from dataset 3 (left) compared to the orthomosaic (right)**

217

218

219

220

221

222

For the field trials, the following Pix4Dmapper Pro [36] outputs (Table 1) were used: P-Matrix (contains information on the internal and external camera parameters), offset (the difference between the local coordinate system of the digital surface model (DSM) and the output coordinate system), the DSM, and the raw image data used to produce an orthomosaic of the field. Equations (2) – (5) are used to determine the coordinates of each microplot in the raw images:

223

$$(X', Y', Z') = (X, Y, Z) - offset \quad (2)$$

224

$$(x, y, z)^t = PMat * (X', Y', Z', 1)^t \quad (3)$$

225

$$u = \frac{x}{z} \quad (4)$$

226

$$v = \frac{y}{z} \quad (5)$$

227

228

229

230

231

232

$(X, Y, Z)$  are the 3D coordinates of the microplot: the values of  $X$  and  $Y$  are obtained during the microplot extraction step, and  $Z$  is the average height of the microplot in the DSM.  $(X', Y', Z')$  are the corrected 3D coordinates of the microplots after they have been fit to the P-Matrix (PMat) coordinates.  $(x, y, z)$  are intermediate 3D coordinates in the camera's coordinate system that are used to convert 3D points into 2D points.  $(u, v)$  are the 2D pixel coordinates of the microplot in the raw image.

233

234

Easy MPE outputs a “\*.csv” file with 11 columns (column number, crop row number, raw image name, and the four  $(u, v)$  corner coordinates of the microplot in the raw image). This



235 output was chosen to exclude unwanted data that would unnecessarily increase computation  
236 times while including the information necessary for the user to be able to easily use the data.

237 Finally, computational times were determined by measuring the processing time  
238 required for each major step, because manual inputs are required in between steps. Processing  
239 times were determined with the time module implemented in Python five times for each field.

240

241 *2.2. Parameters Input into the MPE Program.* The input parameters of the MPE program are  
242 field orthomosaic, type of image (binary or RGB), noise, number of columns, number of crop  
243 rows per column, and global orientation of the columns in the orthomosaic (horizontal or  
244 vertical). The noise parameter is used after the segmentation. Objects smaller than the input  
245 value are removed in order to output a homogeneous image without signals labeled as noise by  
246 the user.

247 For each dataset, the inputs were either self-evident (type of image, number of columns,  
248 number of crop rows per column, global orientation of the columns) or determined from the  
249 field conditions and image resolution (image input, noise). The targeted area in the orthomosaic  
250 (i.e., the field) had to be manually delimited so that the program would be applied to the desired  
251 area.

252 Datasets 5 and 6 were binary images and datasets 1 to 4 were RGB images. One image,  
253 dataset 4, had to be resized because it was too large for our computer to handle.

254 Because the targeted area was manually delimited by the user, the program outputs could  
255 change slightly between trials.

256 Input details are available in **Table S2**.

257

258 *2.3. Manually Produced Reference Microplots.* To evaluate the performance of Easy MPE, we  
259 produced reference microplots manually and used them as ground-truth data. The desired  
260 program output consists of microplots, each having the number of columns and crop rows  
261 specified by the user, so that the user's experimental design can be fit to the field or so that  
262 local field information can be determined more precisely.

263 Reference microplots were delimited by hand on orthomosaic images, as precisely as  
264 possible until the level of accuracy was judged by the user to be sufficient. We aimed at  
265 minimizing the exclusion of the target-MPE plant pixels and minimizing the inclusion of  
266 adjacent rows or columns. Shapefiles for the reference images were produced by using the grid

267 tool in QGIS Las Palmas v. 2.18.24 software [37]. The free, open-source QGIS was used  
268 because it is intuitive and accessible to all users.

269 Although the manually produced reference microplots may include bias introduced by the  
270 user, their use does not compromise the study's aim, which was to compare program-delimited  
271 microplots with manually delimited ones.

272

273 *2.4. Performance Evaluation: Intersection Over Union.* The manually determined microplots  
274 were automatically compared with the program-generated microplots by using the saved  
275 coordinates in their shapefiles and a Python program. This program uses pyshp v. 2.0.1 [32] to  
276 retrieve the \*.shp coordinates from the shapefiles and shapely v. 1.6.4 [38] to compare the  
277 microplot areas.

278 We used the intersection-over-union (IOU) performance criterion [39] to evaluate the  
279 similarity between the predicted area and the ground-truth area of each microplot. IOU is a  
280 standard performance measure used to evaluate object category segmentation performance  
281 (Figure 3).

282 IOU is calculated as (6):

283 
$$IOU (\%) = \frac{manual \cap program}{manual \cup program} \times 100 \quad (6)$$

284

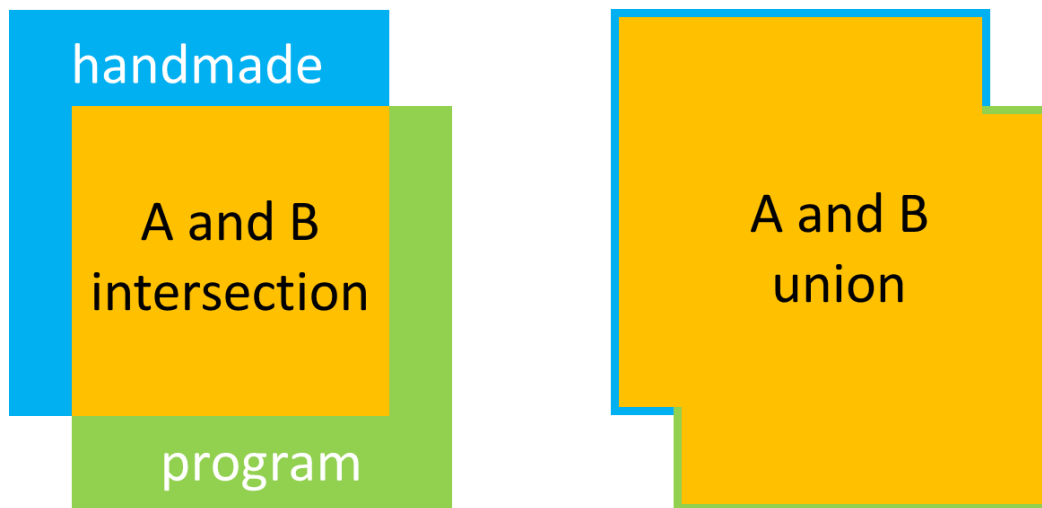

285

286 **Figure 3: Visual representation of the intersection (yellow area on the left) and union**  
287 **(yellow area on the right) areas of manually (blue) and program-determined (green) areas**

288

289 The output is a \*.csv file with six columns: plot identification number, the program \*.shp  
290 area, the manually determined \*.shp area, the intersection area, the union area, and the IOU.

291

292 2.5. *Statistical Analysis.* The population standard deviation is calculated for the IOU as (7):

293 
$$\text{Standard deviation (\%)} = \sqrt{\frac{1}{n} \sum_{i=1}^n (x_i - \bar{x})^2} \times 100 \quad (7)$$

294 where  $n$  is the number of microplots in the targeted field,  $x_i$  is the IOU ratio of microplot  $i$ , and  
295  $\bar{x}$  is the mean IOU of the targeted field.

296

297 Precision  $P$  and recall  $R$  are defined by equations (8) and (9), respectively:

298

299 
$$P = \frac{TP}{TP + FP} = \frac{\text{area correctly labeled as microplots by the program}}{\text{all areas labeled as microplots by the program}} = \frac{\text{manual} \cap \text{program}}{\text{program area}} \quad (8)$$

300 
$$R = \frac{TP}{TP + FN} = \frac{\text{area correctly labeled as a microplot by the program}}{\text{all areas manually labeled as microplots}} = \frac{\text{manual} \cap \text{program}}{\text{manual area}} \quad (9)$$

301

302 TP indicates a true positive: what has been correctly considered by the program to be part of a  
303 microplot; thus,  $TP = \text{manual area} \cap \text{program area}$  (yellow area on the left side of Fig. 3). FP  
304 indicates a false positive: what has been incorrectly been considered by the program to be part  
305 of a microplot; thus  $FP = \text{program area} - \text{manual} \cap \text{program area}$  (green area on the left side of  
306 Fig. 3). FN means a false negative: areas in the manually determined shapefiles that were not  
307 considered to be part of microplots in the program shapefiles. Thus,  $FN = \text{manual area} - \text{manual}$   
308  $\cap \text{program area}$  (blue area on the left side of Fig. 3).

309 Thus,  $P$  gives the percentage of the program-determined microplot area that has been  
310 correctly identified by the program, and  $R$  is the percentage of the manually determined  
311 microplot area that has been correctly identified by the program. If the program-determined  
312 (manually determined) area is wholly included in the manually determined (program-  
313 determined) area, then  $P$  ( $R$ ) will be equal to 100%.

314 We also calculated the standard deviations of  $P$  and  $R$ .

315

### 316 3. Comparison results

317

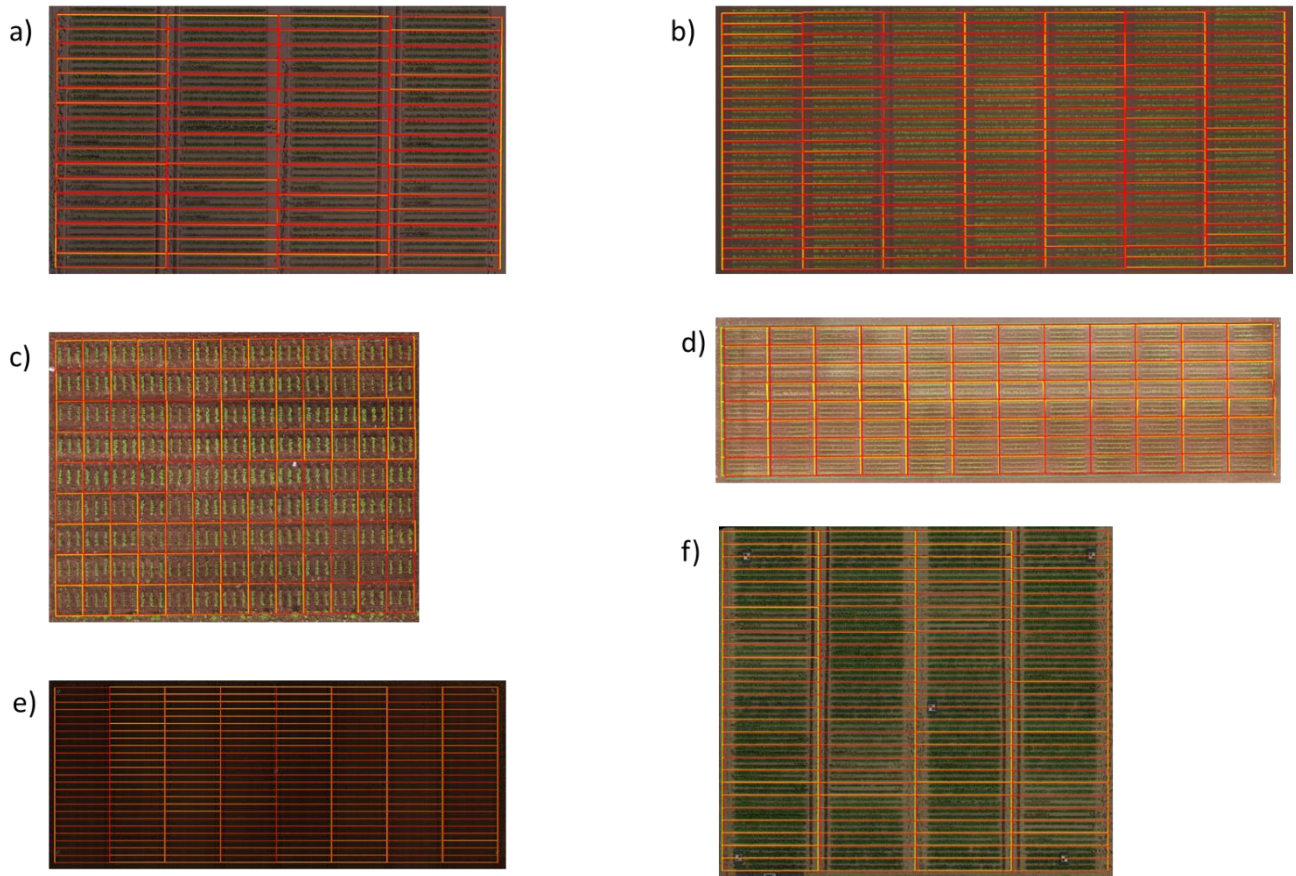

318

319 **Figure 4: Comparisons of manually determined (yellow lines) and program-determined**  
 320 **(red lines) microplot boundaries: (a – f) Datasets 1–6**

321

322 **Table 2: Intersection-over-union results**

| Trial fields   | Average IOU (%) | SD of IOU (%) | Average precision (%) | SD of precision (%) | Average recall (%) | SD of recall (%) |
|----------------|-----------------|---------------|-----------------------|---------------------|--------------------|------------------|
| Dataset 1      | 93.0            | 3.0           | 95.0                  | 2.20                | 98.0               | 2.08             |
| Dataset 2      | 86.0            | 5.0           | 95.0                  | 2.22                | 91.0               | 5.64             |
| Dataset 3      | 92.0            | 3.0           | 96.0                  | 1.86                | 96.0               | 2.06             |
| Dataset 4      | 88.0            | 3.0           | 94.0                  | 2.09                | 94.0               | 1.62             |
| Dataset 5      | 93.0            | 4.0           | 97.0                  | 2.18                | 96.0               | 2.04             |
| Dataset 6      | 92.0            | 3.0           | 96.0                  | 1.72                | 96.0               | 1.87             |
| <b>Average</b> | <b>90.7</b>     | <b>3.5</b>    | <b>95.5</b>           | <b>2.05</b>         | <b>95.2</b>        | <b>2.55</b>      |

323

324 The program successfully identified microplots in all trial fields (Fig. 4).

325 The mean IOU among the datasets was 91% ( $\pm 3\%$ ), indicating a 91% overlap between  
 326 program-determined and manually determined microplot areas. Moreover, among these fields,  
 327 an IOU of < 80% was obtained only for dataset 2, which comprised 20 individual microplots

328 (the lowest IOU being 71%).

329 Mean precision and recall were 95% ( $\pm 2\%$ ) and 95% ( $\pm 2\%$ ), respectively. These results  
330 indicate that neither manually determined nor program-determined microplots showed a  
331 tendency to be wholly included in the other. Therefore, the IOU can be understood to indicate  
332 a shifting of microplot boundaries between them.

333

334 *3.2. Computation Time.* Computation time depends, of course, on the computer used to run the  
335 program.

336

337 **Table 3: Average computational times of Easy MPE per major step for each dataset**

| Trial field | Binary segmentation (s) | Microplot extraction (s) | Reverse calculation (s) | Total time (s) |
|-------------|-------------------------|--------------------------|-------------------------|----------------|
| Dataset 1   | 8.537                   | 97.925                   | 22.75                   | 129.212        |
| Dataset 2   | 15.491                  | 551.794                  | 80.76                   | 648.045        |
| Dataset 3   | 16.609                  | 403.081                  | 60.7                    | 480.39         |
| Dataset 4   | 22.972                  | 670.2                    | *                       | *              |
| Dataset 5   | 2.631                   | 191.369                  | 65.419                  | 259.419        |
| Dataset 6   | 1.506                   | 68.485                   | 20.272                  | 90.263         |

338 \* Reverse calculation could not be performed on dataset 4 due to a lack of the required inputs.

339 The computational times (Table 3) varied among the trial images, but some global trends  
340 can be observed by comparing the computational times in Table 3 with dataset information  
341 provided in Table S1 and S2. The program was slower overall when dealing with larger  
342 images, which is to be expected because the program involves image manipulation. The  
343 computational time required for binary segmentation depended mostly on the type of input  
344 (binary or RGB), whereas the time required for microplot extraction and reverse calculation  
345 depended mainly on the number of microplots in the trial field, because this number  
346 determines the number of images that must be manipulated in each of these steps.

347

#### 348 **4. Discussion**

349 The microplot results obtained by Easy MPE were similar to those obtained manually.  
350 However, manual identification means only that the accuracy is controlled and judged to be  
351 acceptable. Thus, the relationship between the IOU and “absolute accuracy” depends on the  
352 precision with which the reference plots are defined. The study results confirm that the accuracy  
353 of the program is similar to that obtained by manual identification of microplots, but a direct

354 comparison of the results obtained by the two methods suggests that the program-determined  
355 microplots are more precise and more regular than those determined manually (Fig. 4).

356 In addition, Easy MPE places a few conditions on the initial image. The field must be  
357 fairly homogeneous and crop rows should not touch each other, or not much. These conditions  
358 were met by both the soybean and sugarbeet fields in this study, but it is necessary to test other  
359 types of fields as well. Continuous field observations (including multiple drone flights) are  
360 likely to be required to get the usable image. Image pretreatment by removing weed pixels,  
361 either manually or automatically, would help Easy MPE to get good results.

362 The only manual input to the program is plot delimitation by the user at the very  
363 beginning. It is essential that no segmented objects other than the field be included in the region  
364 of interest. It might be possible to automate this step by providing GPS coordinates from the  
365 seeder or by using an already cropped orthomosaic image, but either method would diminish  
366 the freedom of the user to apply the program to an area smaller than the whole field.

367 Also please note that application of the program is limited by the available computer,  
368 as shown by the example of dataset 4.

369 The MPE method used by Easy MPE is different from previously published methods.  
370 Easy MPE uses image parameters and information on the field geometry to adapt itself to the  
371 field, whereas in the method proposed by Khan and Miklavcic [12], a cellular grid is laid over  
372 the image so that each individual rectangular cell is optimally aligned. Online software (e.g.,  
373 [11]) also uses a grid and requires the user to indicate the positions of several microplots. Easy  
374 MPE asks for a working zone delimitation and no other image manipulation, increasing its user-  
375 friendliness. This method has been built as a piece of a suite of open-source programs for high-  
376 throughput phenotyping, along with Easy PCC [18] and future additions.

377 Other published methods do not include the reverse calculation step, which allows Easy  
378 MPE to provide images of the same quality as the raw images. The Easy MPE reverse  
379 calculation procedure is coded for Pix4D outputs, but outputs of free SfM software outputs  
380 could be used as well. Three files are required [40]:

- 381 - The P-Matrix file, which contains information about the internal and external camera  
382 parameters, allowing the 3D coordinates to be converted into 2D coordinates.
- 383 - A DSM file, which is the usual output of SfM software.
- 384 - An Offset file, which contains the offsets between local coordinate system points used  
385 in the creation of some of the output and the output coordinate system.

386 Note that the code would need to be adapted to be able to extract the needed data from free  
387 SfM software outputs, but the adapted Easy MPE code would then be entirely free.

388 Other possible improvements include the implementation of a different vegetation index  
389 such as NDVI, SAVI, or GNDVI for preprocessing segmentation, and the linking of EasyPCC  
390 to Easy MPE. Verification methods could also be added as an option; for example, the Hough  
391 transform or the average distance between crop rows within microplots could be used to verify  
392 that the field components are correctly identified. These methods could be used only with  
393 geometric fields that are very constant in the seeds repartition; they would thus narrow the  
394 applicability of the code.

395 Finally, the code needs to be further tested and improved by applying it to other  
396 important crops that are not as densely planted as soybean and sugarbeet, such as maize or  
397 wheat. Fields with crop-residues have not been tested either in this demonstration. The impact  
398 of a poor quality orthomosaic has not been investigated and should be measured in order to give  
399 the plant phenotyping community good insights about the possible uses of EasyMPE.

400 Overall:

- 401 - Easy MPE is recommended for its user-friendliness and simplicity; however,  
402 many points still have to be tested and approved, which leaves room for  
403 improvement. The micro-plots are delimited in an unbiased way, i.e. without  
404 human influence. It is part of an open-source suite of programs designed for the  
405 plant phenotyping community, include a segmentation step if needed and  
406 provides the first automation of the reverse calculation process.
- 407 - Grid-based programs are efficient as demonstrated by many publications.  
408 Improvement has been made recently, as in [11], and gives quite robust tools for  
409 MPE identification. It automatically requires for crops to be rectangular-shaped  
410 and adding a grid can be impacted by human perception, adding possible errors.  
411 It does not provide any additional services.
- 412 - In [9], the process can be fully automatic if the process and GPS localization are  
413 extremely precise (RTK recommended) and the field can access a high level of  
414 technology and informatics competencies.

415

## 416 **Acknowledgments**

417 The authors thank Dr. Shunji Kurokawa, Division of Crop Production Systems, Central Region  
418 Agricultural Research Center, NARO, Japan; technicians of the Institute for Sustainable Agro-  
419 ecosystem Services, The University of Tokyo; and members of the Memuro Upland Farming  
420 Research Station, Hokkaido Agricultural Research Center, NARO for field management  
421 support.

422

423 **Author contributions:**

424 LT developed the algorithm and Python code with input from WG; YM conducted the reverse  
425 calculations; AI developed the executable Windows program; WG, AK, and KT conceived,  
426 designed, and coordinated the field experiments; WG, MH, and SN supervised the entire study;  
427 LT wrote the paper with input from all authors. All authors read and approved the final  
428 manuscript.

429

430 **Funding:**

431 This work was partly funded by the CREST Program “Knowledge Discovery by Constructing  
432 AgriBigData” (JPMJCR1512) and the SICORP Program “Data Science-based Farming Support  
433 System for Sustainable Crop Production under Climatic Change” of the Japan Science and  
434 Technology Agency; “Smart-breeding System for Innovative Agriculture (BAC3001)” of the  
435 Ministry of Agriculture, Forestry and Fisheries of Japan.

436

437 **Competing interests:**

438 The authors declare that they have no conflict of interest regarding this work or its publication.

439

440 **Data Availability:** *Submission of a manuscript to Plant Phenomics implies that the data is*  
441 *freely available upon request or has deposited to a open database, like NCBI. If data are in an*  
442 *archive, include the accession number or a placeholder for it. Also include any materials that*  
443 *must be obtained through an MTA.*

444 <https://github.com/oceam/EasyMPE>

445

446 **References**

- 447 [1] D. Tilman, C. Balzer, J. Hill, B.L. Befort, *Global food demand and the sustainable*  
448 *intensification of agriculture*, Proceedings of the National Academy of Sciences Dec  
449 2011, 108 (50) 20260-20264; <https://doi.org/10.1073/pnas.1116437108>
- 450 [2] J.L. Araus, J.E. Cairns, *Field high-throughput phenotyping: the new crop breeding*  
451 *frontier*, Trends in Plant Science, January 2014, 52-61;  
452 <https://doi.org/10.1016/j.tplants.2013.09.008>
- 453 [3] G. J. Rebetzke, J. Jimenez-Berni, R. A. Fischera, D. M. Deery, D. J. Smith, *Review: High-*  
454 *throughput phenotyping to enhance the use of crop genetic resources*, Frontiers in Plant  
455 Science, May 2019, volume 282, pages 40-48;



- 456 <https://doi.org/10.1016/j.plantsci.2018.06.017>
- 457 [4] W. Guo, B. Zheng, A.B. Potgieter, J. Diot, K. Watanabe, K. Noshita, S.C. Chapman.  
458 (2018). *Aerial Imagery Analysis – Quantifying Appearance and Number of Sorghum*  
459 *Heads for Applications in Breeding and Agronomy*. *Frontiers in Plant Science*,  
460 9(October), 1–9. <https://doi.org/10.3389/fpls.2018.01544>
- 461 [5] P. Hu, W. Guo, S.C. Chapman, Y. Guo, B. Zheng. (2019). *Pixel size of aerial imagery*  
462 *constrains the applications of unmanned aerial vehicle in crop breeding*. *ISPRS Journal*  
463 *of Photogrammetry and Remote Sensing*, 154, 1–9.  
464 <https://doi.org/10.1016/j.isprsjprs.2019.05.008>
- 465 [6] S. Ghosal, B. Zheng, S.C. Chapman, A.B. Potgieter, D.R. Jordan, X. Wang, W. Guo  
466 (2019). *A Weakly Supervised Deep Learning Framework for Sorghum Head Detection*  
467 *and Counting*. *Plant Phenomics*. <https://doi.org/10.34133/2019/1525874>
- 468 [7] M.F. Dreccer, G. Molero, C. Rivera-Amado, C. John-Bejai, Z. Wilson, *Yielding to the*  
469 *image: How phenotyping reproductive growth can assist crop improvement and*  
470 *production*, *Plant Science*, May 2019, volume 282, pages 73-82;  
471 <https://doi.org/10.1016/j.plantsci.2018.06.008>
- 472 [8] T. Duan, B. Zheng, W. Guo, S. Ninomiya, Y. Guo, S.C. Chapman (2016). *Comparison of*  
473 *ground cover estimates from experiment plots in cotton, sorghum and sugarcane based*  
474 *on images and ortho-mosaics captured by UAV*. *Functional Plant Biology*.  
475 <https://doi.org/10.1071/FP16123>
- 476 [9] A.A. Hearst, *Automatic Extraction of plots from geo-registered UAS imagery of crop*  
477 *fields with complex planting schemes*, *Open Access Theses* (2014) 332  
478 [https://docs.lib.purdue.edu/open\\_access\\_theses/332](https://docs.lib.purdue.edu/open_access_theses/332)
- 479 [10] Solvi, *Zonal Statistics and Trial Plots Analytics*. Available online:  
480 <https://help.solvi.nu/article/34-zonal-statistics-and-trial-plots-analytics> (last accessed in  
481 July 2019)
- 482 [11] Z. Khan, S.J. Miklavcic, *An Automatic Field Plot Extraction Method From Aerial*  
483 *Orthomosaic Images*, *Frontiers Plant Science* (2019)  
484 <https://doi.org/10.3389/fpls.2019.00683>
- 485 [12] M. Wallhead, H. Zhu, J. Sulik, W. Stump, *A workflow for extracting plot-level*  
486 *biophysical indicators from aerially acquired multispectral imagery*, *Plant Health*  
487 *Progress* (2017) 18:95-96 <https://doi.org/10.1094/PHP-04-17-0025-PS>
- 488 [13] R. Makanza, M. Zaman-Allah, J.E. Cairns, C. Magorokosho, A. Tarekegne, M. Olsen,  
489 B.M. Prasanna, *High-Throughput Phenotyping of Canopy Cover and Senescence in*

- 490 *Maize Field Trials using aerial digital canopy imaging*, Remote Sensing, 10 (2018),  
491 <https://doi.org/10.3390/rs10020330>
- 492 [14] A. Haghghattalab, L. González Pérez, S. Mondal, D. Singh, D. Schinstock, J. Rutkoski,  
493 I. Ortiz-Monasterio, R. Prakash Singh, D. Goodin, J. Poland, *Application of unmanned*  
494 *aerial systems for high throughput phenotyping of large wheat breeding nurseries*, Plant  
495 Methods (2016); <https://doi.org/10.1186/s13007-016-0134-6>
- 496 [15] X. Wang, D. Singh, S. Marla, G. Morris, J. Poland, *Field-based high-throughput*  
497 *phenotyping of plant height in sorghum using different sensing technologies*, Plant  
498 Methods (2018) <https://doi.org/10.1186/s13007-018-0324-5>
- 499 [16] G. E. Meyer, J.C. Neto, *Verification of color vegetation indices for automated crop*  
500 *imaging applications*, Computers and Electronics in Agriculture v. 63 (2), 282-293  
501 (2008), <https://doi.org/10.1016/j.compag.2008.03.009>
- 502 [17] N. Otsu, *A Threshold Selection Method from Gray-Level Histograms*, IEEE Transactions  
503 on Systems, Man, and Cybernetics, Vol. 9 (1), 62-66 (1979),  
504 <https://doi.org/10.1109/TSMC.1979.4310076>
- 505 [18] W. Guo, B. Zheng, T. Duan, T. Fukatsu, S. Chapman, S. Ninomiya, *EasyPCC:*  
506 *Benchmark datasets and tools for high-throughput measurement of plant canopy*  
507 *coverage ratio under field conditions*, Sensors, 17(4), 798 (2017);  
508 <https://doi.org/10.3390/s17040798>
- 509 [19] D. Woebbecke, G. Meyer, K. VonBargen, D. Mortensen, *Color indices for weed*  
510 *identification under various soil, residue, and lighting conditions*, Trans. ASAE, 38 (1),  
511 271-281 (1995)
- 512 [20] E. Hamuda, M. Glavin, E. Jones, *A survey of image processing techniques for plant*  
513 *extraction and segmentation in the field*, Computers and Electronics in Agriculture,  
514 Volume 125, 184-199 (2016); <https://doi.org/10.1016/j.compag.2016.04.024>
- 515 [21] M. P. Ponti, *Segmentation of Low-Cost Remote Sensing Images Combining Vegetation*  
516 *Indices and Mean Shift*, IEEE Geoscience And Remote Sensing Letters, Vol. 10 (1); 67-  
517 70 (2013), <https://doi.org/10.1109/LGRS.2012.2193113>
- 518 [22] FAO, *Sugarbeet*. Available online: [http://www.fao.org/land-water/databases-and-](http://www.fao.org/land-water/databases-and-software/crop-information/sugarbeet/en/)  
519 [software/crop-information/sugarbeet/en/](http://www.fao.org/land-water/databases-and-software/crop-information/sugarbeet/en/) (last accessed in July 2019)
- 520 [23] FAO, *Soybean*. Available online: [http://www.fao.org/land-water/databases-and-](http://www.fao.org/land-water/databases-and-software/crop-information/soybean/en/)  
521 [software/crop-information/soybean/en/](http://www.fao.org/land-water/databases-and-software/crop-information/soybean/en/) (last accessed in July 2019)
- 522 [24] J.R. Lamichhane, J. Constantin, J-N. Aubertot, C. Dürr, *Will climate change affect sugar*  
523 *beet establishment of the 21st century? Insights from a simulation study using a crop*

- 524 *emergence model*, Field Crops Research, May 2019, volume 238, pages 64-73;  
525 <https://doi.org/10.1016/j.fcr.2019.04.022>
- 526 [25] M.D. Bhattarai, S. Secchi, J. Schoof, *Projecting corn and soybeans yields under climate*  
527 *change in a Corn Belt watershed*, Agricultural Systems, March 2017, volume 152, pages  
528 90-99; <https://doi.org/10.1016/j.agsy.2016.12.013>
- 529 [26] Available at <http://www.python.org> (last accessed in June 2019)
- 530 [27] Itseez. OpenCV 2018. Available online: <https://github.com/itseez/opencv> (last accessed  
531 in June 2019)
- 532 [28] Available at <https://www.riverbankcomputing.com/software/pyqt/download5> (last  
533 accessed in June 2019)
- 534 [29] Travis E. Oliphant. *A guide to NumPy*, USA: Trelgol Publishing, (2006).
- 535 [30] Stéfan van der Walt, Johannes L. Schönberger, Juan Nunez-Iglesias, François Boulogne,  
536 Joshua D. Warner, Neil Yager, Emmanuelle Gouillart, Tony Yu and the scikit-image  
537 contributors. *scikit-image: Image processing in Python*, PeerJ 2:e453 (2014)
- 538 [31] Fabian Pedregosa, Gaël Varoquaux, Alexandre Gramfort, Vincent Michel, Bertrand  
539 Thirion, Olivier Grisel, Mathieu Blondel, Peter Prettenhofer, Ron Weiss, Vincent  
540 Dubourg, Jake Vanderplas, Alexandre Passos, David Cournapeau, Matthieu Brucher,  
541 Matthieu Perrot, Édouard Duchesnay. *Scikit-learn: Machine Learning in Python*, Journal  
542 of Machine Learning Research, 12, 2825-2830 (2011)
- 543 [32] Available at <https://github.com/GeospatialPython/pyshp> (last accessed in June 2019)
- 544 [33] Sean Gillies and others, *Rasterio: geospatial raster I/O for Python programmers*,  
545 Mapbox, (2013)
- 546 [34] Available at <https://pythonhosted.org/rasterstats/index.html> (last accessed in June 2019)
- 547 [35] S. Gillies and others, *Fiona is OGR's neat, nimble, no-nonsense API*, Toblerity, (2011)
- 548 [36] Available at <https://www.pix4d.com/> (last accessed in June 2019)
- 549 [37] Available at <http://qgis.osgeo.org> (last accessed in June 2019)
- 550 [38] S. Gillies and others, *Shapely: manipulation and analysis of geometric objects*,  
551 [toblerity.org](http://toblerity.org), (2007). Available online at: <https://github.com/Toblerity/Shapely> (accessed  
552 in December 2018)
- 553 [39] M. Everingham, L. Van Gool, C.K.I. Williams, J. Winn, A. Zisserman, *The Pascal*  
554 *Visual Object Classes (VOC) Challenge*, International Journal of Computer Vision, 88,  
555 303–338 (2010) <https://doi.org/10.1007/s11263-009-0275-4>
- 556 [40] Pix4D, *What does the Output Params Folder contain?* Available at  
557 <https://support.pix4d.com/hc/en-us/articles/202977149-What-does-the-Output-Params->

558 Folder-contains#label12 (last accessed in July 2019)

559 [41] Guo W, Rage UK, Ninomiya S. Illumination invariant segmentation of vegetation for

560 time series wheat images based on decision tree model. *Comput Electron Agric*. Elsevier

561 B.V.; 2013;96:58–66 (2013). Available online at:

562 <http://dx.doi.org/10.1016/j.compag.2013.04.010>

563

564 **Supplementary Materials**

565

566 **Table S1: Details about image acquisition of the trial fields**

| Field                  | Camera model                                                      | Drone reference | Pix4D version | Number of drone images |
|------------------------|-------------------------------------------------------------------|-----------------|---------------|------------------------|
| Dataset 1              | FC550 RAW DJIMFT 15 mm <i>f</i> /1.7                              | DJI Inspire 1   | 4.2.25        | 156                    |
| Dataset 2              | ASPH 15.0 4608 × 3456 (RGB)                                       |                 | 4.1.24        | 210                    |
| Dataset 3              | FC 6520 DJIMFT 15 mm <i>f</i> /1.7 ASPH<br>15.0 5280 × 3956 (RGB) | DJI Inspire 2   | 4.2.25        | 198                    |
| Dataset 4<br>(resized) |                                                                   |                 | 3.3.29        | 193                    |
| Dataset 5              | FC 6310 8.8 5472 × 3648 (RGB)                                     | DJI Inspire 1   | 4.2.26        | 121                    |
| Dataset 6              |                                                                   |                 | 4.2.26        | 121                    |

567

568 **Table S2: Easy MPE program inputs for each dataset**

| Trial field | Type of image | Date of chosen image<br>(dd/mm/yyyy) | Noise (px) | Number of columns per microplot | Number of crop rows per microplot column | Column orientation |
|-------------|---------------|--------------------------------------|------------|---------------------------------|------------------------------------------|--------------------|
| Dataset 1   | RGB           | 31/05/2017                           | 200        | 1                               | 2                                        | Vertical           |
| Dataset 2   | RGB           | 16/06/2017                           | 100        | 1                               | 2                                        | Vertical           |
| Dataset 3   | RGB           | 10/07/2017                           | 1000       | 1                               | 3                                        | Vertical           |
| Dataset 4   | RGB           | 10/07/2017                           | 200        | 1                               | 4                                        | Horizontal         |
| Dataset 5   | Binary        | 07/06/2018                           | 700        | 1                               | 2                                        | Vertical           |
| Dataset 6   | Binary        | 05/06/2018                           | 500        | 1                               | 2                                        | Vertical           |

569
